# Supplementary material for: Effects of the Maillard reaction on the epitopes and immunoreactivity of tropomyosin, a major allergen inChlamys nobilis
Source: Royal Society of Chemistry journal article supplement (doi:10.1039/d1fo00270h), 2021-01-01
Supplement: d1fo00270h1.pdf [file d1fo00270h1.pdf]

## **Online Supplementary Material**

### **Supplementary Methods**

#### **Preparation of rabbit anti-*C. nobilis* TM polyclonal antibodies**

The specific polyclonal antibody was prepared by subcutaneously injecting of the *C. nobilis* TM in an adult female New Zealand white rabbit by immunizing with purified protein at Xiamen University (Xiamen, Fujian, China), the specific polyclonal antibody was similar with the previous study.<sup>1</sup> Determination of the rabbit anti-*C. nobilis* TM polyclonal antibody titer was shown in Figure S1A.

1. T. J. Han, M. Liu, F. Huan, M. S. Li, F. Xia, Y. Y. Chen, G. X. Chen, M. J. Cao and G. M. Liu, Identification and cross-reactivity analysis of sarcoplasmic-calcium-binding protein: a novel allergen in *Crassostrea angulata*, *J. Agr. Food Chem.*, 2020, **68**, 5221-5231.

Table S1. Specific IgE levels and symptoms of the scallop-sensitized individuals

| Serum No.      | Age (years) | Sex <sup>a</sup> | Scallop specific IgE (kUA/L) <sup>b</sup> | Symptoms              |
|----------------|-------------|------------------|-------------------------------------------|-----------------------|
| 1 <sup>c</sup> | 10          | M                | 0.1                                       | — <sup>d</sup>        |
| 2 <sup>c</sup> | 28          | F                | 0.3                                       | — <sup>d</sup>        |
| 3 <sup>c</sup> | 53          | M                | 0.1                                       | — <sup>d</sup>        |
| 4 <sup>c</sup> | 5           | F                | 0.2                                       | — <sup>d</sup>        |
| 5              | 15          | M                | 13.6                                      | atopic dermatitis     |
| 6              | 40          | F                | 15.8                                      | allergic purpura      |
| 7              | 58          | M                | 11.4                                      | urticaria             |
| 8              | 25          | F                | 14.6                                      | cough                 |
| 9              | 6           | M                | 18.4                                      | anaphylactic rhinitis |
| 10             | 11          | F                | 11.8                                      | cough                 |
| 11             | 25          | F                | 8.4                                       | edema                 |
| 12             | 43          | M                | 7.4                                       | edema                 |
| 13             | 32          | F                | 5.4                                       | bronchitis            |
| 14             | 12          | F                | 8.7                                       | cough                 |
| 15             | 22          | F                | 6.2                                       | urticaria             |

<sup>a</sup>M, male; F, female. <sup>b</sup>A sera with specific IgE  $\geq 0.35$  kUA/L is defined as positive. <sup>c</sup>The person was nonallergic individual. <sup>d</sup>Means no symptoms when the experiment.

Table S2. Maillard reaction modification of eleven specific amino acids on seven IgE epitopes.

| Modified amino acids on IgE epitopes | Modification                                           |
|--------------------------------------|--------------------------------------------------------|
| K12                                  | Furfural                                               |
| R15                                  | Acetaldehyde, Carboxymethyl, Carboxyethyl              |
| K28                                  | Methyl, Methoxy, Furfural                              |
| K76                                  | Acetaldehyde                                           |
| R125                                 | Acetaldehyde, Furfural, Furan, Carboxyethyl, Pyrroline |
| R127                                 | Acetaldehyde, Furfural, Furan, Carboxyethyl, Pyrroline |
| K128                                 | Acetaldehyde, Furan, Carboxyethyl, Pyrroline           |
| R133                                 | Furan, Carboxymethyl, Carboxyethyl                     |
| R140                                 | Methyl, Carboxymethyl, Carboxyethyl                    |
| K146                                 | Acetaldehyde                                           |
| K189                                 | Acetaldehyde, Carboxymethyl, Carboxyethyl, Pyrroline   |

**Supplementary Figure Legends**

**Figure S1. Preparation and verification of rabbit anti-*C. nobilis* TM polyclonal antibodies**

(A) Determination of the rabbit anti-*C. nobilis* TM polyclonal antibody titer.

Dot blot analysis of the rabbit anti-*C. nobilis* TM polyclonal antibody titers, 1: 100-1:  $2 \times 10^5$  is the polyclonal antibody dilution.

(B) SDS-PAGE analysis verification of TM. Lane M: protein marker; Lane 1-2, TM, BSA.

(C) Western blot verification of TM. (primary antibody: specific TM-polyclonal antibodies, dilution 1:  $1 \times 10^4$ ). Lane M: protein marker; Lane 1-2, TM, BSA.

**Figure S1**

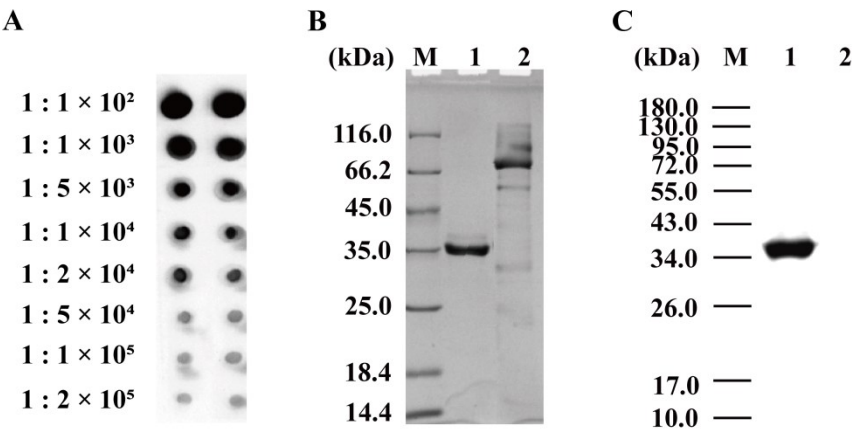

**Figure S2. Eighteen individual mimotopes were identified by Phage display random peptide library.**

**Figure S2**

---LQWVPAPNSFNI  
---LRWVPAINSENI  
SIPLTVVPTANA---  
--KLLRVVNQNPIQ-  
MFQVNLFPFKRT---  
-SENKKVPLKELR-  
---NNWATLVDEMRS  
-GLINSAPTkimr-  
-HTTASLATKTTI-  
-LATNYHKSIR-  
-SYIGISGLVTGA-  
-GQVYAGSSPFAK-  
AMKVSSDPIQQK---  
---TFRQPGFTKVST  
-PFHDFQLISTHF-  
ASHTGTAQISRQ---  
GDASERGFPLHG---  
-HHLTHLTCDVCV-
